# Supplementary material for: Comparison of Geographical Traceability of Wild and Cultivated Macrohyporia cocos with Different Data Fusion Approaches
Source: Hindawi journal article supplement (doi:10.1155/2021/5818999), 2021-07-21
Supplement: f1 [file 5818999.f1.pdf]

1 Supplementary Material

2 **Comparison of geographical traceability of wild and cultivated**  
3 ***Macrohyporia cocos* with different data fusion approaches**

4 Li Wang <sup>a, b</sup> Qinqin Wang <sup>c, d</sup>, Yuanzhong Wang <sup>\*d</sup>, Yunmei Wang <sup>\*a</sup>

5 <sup>a</sup> *Quality Standards And Testing Technology Research Institute, Yunnan Academy of Agricultural Sciences,*  
6 *650205, Kunming, China*

7 <sup>b</sup> *College of Agronomy and Biotechnology, Yunnan Agricultural University, Kunming 650201, China.*

8 <sup>c</sup> *The First Affiliated Hospital of Yunnan University of Traditional Chinese Medicine, 650021, Kunming,*  
9 *China*

10 <sup>d</sup> *Medicinal Plants Research Institute, Yunnan Academy of Agricultural Sciences, 650200, Kunming, China*

11 <sup>\*</sup> Corresponding author telephone: +86 871-65033564 (Yuanzhong Wang).

12 *E-mail addresses:* [wlwanglidong@126.com](mailto:wlwanglidong@126.com) (Li Wang), [boletus@126.com](mailto:boletus@126.com) (Yuanzhong Wang),  
13 [1347914675@qq.com](mailto:1347914675@qq.com) (Yunmei Wang).

14 **Table S1.**15 The information of *M. cocos* samples.

| Class        | Collection area | Description | Latitude     | Longitude     | Number        |               |   |
|--------------|-----------------|-------------|--------------|---------------|---------------|---------------|---|
| 1            | Pu'er           | Cultivated  | N23°25'13.4" | E100°24'15.7" | 8             |               |   |
|              |                 |             | N23°04'03.5" | E101°58'35.5" | 8             |               |   |
|              |                 | Wild        | N24°04'38.4" | E100°47'25.8" | 1             |               |   |
|              |                 |             | N24°11'33.0" | E101°12'31.1" | 1             |               |   |
|              |                 |             | N24°10'02.2" | E100°50'38.0" | 1             |               |   |
|              |                 |             | N23°27'20.2" | E101°43'00.6" | 1             |               |   |
|              |                 |             | N24°26'59.0" | E100°48'16.5" | 1             |               |   |
|              |                 |             | N24°03'15.2" | E100°47'18.8" | 1             |               |   |
|              |                 |             | N24°18'19.0" | E100°57'56.0" | 5             |               |   |
|              |                 |             | N23°51'10.0" | E100°52'16.4" | 1             |               |   |
|              |                 |             | Cultivated   | N24°29'44.6"  | E101°34'5.8"  | 8             |   |
|              |                 |             |              | N24°32'08.0"  | E101°38'25.2" | 8             |   |
|              |                 | 2           | Chuxiong     | Wild          | N24°39'57.4"  | E101°05'42.7" | 1 |
|              |                 |             |              |               | N24°52'38.7"  | E100°56'32.2" | 1 |
| N25°11'16.5" | E100°53'52.4"   |             |              |               | 1             |               |   |
| N24°40'48.9" | E101°16'57.0"   |             |              |               | 1             |               |   |
| N24°53'57.1" | E101°07'37.3"   |             |              |               | 1             |               |   |
| N24°28'08.3" | E101°32'52.6"   |             |              |               | 1             |               |   |
| N24°59'22.3" | E100°54'23.0"   |             |              |               | 1             |               |   |
| N25°01'47.3" | E100°51'21.1"   |             |              |               | 1             |               |   |
| N24°33'29.4" | E101°26'29.8"   |             |              |               | 1             |               |   |
| N24°26'24.0" | E101°13'55.0"   |             |              |               | 1             |               |   |
| 3            | Dali            | Cultivated  | N25°38'09.8" | E99°7'55.08"  | 10            |               |   |
|              |                 | Wild        | N25°32'09.8" | E99°41'05.7"  | 10            |               |   |
| 4            | Baoshan         | Cultivated  | N24°28'08.5" | E99°30'11.5"  | 10            |               |   |
|              |                 | Wild        | N24°41'07.8" | E98°36'52.6"  | 10            |               |   |
| 5            | Yuxi            | Cultivated  | N24°25'54.7" | E102°31'05.6" | 10            |               |   |
|              |                 | Wild        | N23°48'23.2" | E102°51'59.4" | 9             |               |   |
|              |                 |             | N23°22'25.3" | E101°51'07.7" | 10            |               |   |

16

17 **Table S2.**18 The limits of detection (LOD) and limits of quantification (LOQ), regression equations, correlation coefficients and  
19 linear ranges of five reference compounds.

| Components               | LOD<br>(mg·mL <sup>-1</sup> ) | LOQ<br>(mg·mL <sup>-1</sup> ) | Regression equation            | <i>r</i> <sup>2</sup> | Linear range<br>(mg·mL <sup>-1</sup> ) |
|--------------------------|-------------------------------|-------------------------------|--------------------------------|-----------------------|----------------------------------------|
| Dehydrotumulosic acid    | 0.0002                        | 0.0005                        | $Y = 11319140.93X + 74475.78$  | 0.9983                | 0.005–1.0                              |
| Dehydropachymic acid     | 0.00024                       | 0.0015                        | $Y = 12988529.78X + 7769.17$   | 0.9998                | 0.0024–0.48                            |
| Pachymic acid            | 0.010                         | 0.10                          | $Y = 7905709.32X + 42996.45$   | 0.9937                | 0.010–1.2                              |
| Dehydrotrametenolic acid | 0.00049                       | 0.002                         | $Y = 21538210.94X + 107194.87$ | 0.9993                | 0.00049–2.4                            |
| Poricoic acid A          | 0.00022                       | 0.00045                       | $Y = 22522136.84X + 42388.59$  | 0.9999                | 0.00022–1.1                            |

20

21 **Table S3.**

22 The classification efficiency and total accuracy rate of the PLS-DA model processed by SG polynomial second-  
 23 derivative.

| Data source     | Pretreatment | Calibration set |         |         |         |         | Total accuracy (%) | Validation set |         |         |         |         | Total accuracy (%) |
|-----------------|--------------|-----------------|---------|---------|---------|---------|--------------------|----------------|---------|---------|---------|---------|--------------------|
|                 |              | Class 1         | Class 2 | Class 3 | Class 4 | Class 5 |                    | Class 1        | Class 2 | Class 3 | Class 4 | Class 5 |                    |
| LC-wild         | Raw          | 0.35            | 0.87    | 1       | 0.99    | 0.89    | 77.50%             | 0              | 0.97    | 1       | 1       | 0.89    | 80.95%             |
|                 | Processed    | 1               | 0.91    | 0.98    | 1       | 1       | 97.50%             | 0.71           | 0.87    | 0.94    | 0.97    | 0.88    | 80.95%             |
| FTIR-wild       | Raw          | 0               | 0.55    | 0.87    | 0.40    | 0.73    | 50%                | 0              | 0.66    | 0.91    | 0.49    | 0.70    | 47.62%             |
|                 | Processed    | 1               | 1       | 1       | 1       | 1       | 100%               | 0.66           | 0.66    | 1       | 1       | 1       | 80.95%             |
| LC-cultivated   | Raw          | 0.92            | 0.98    | 0.76    | 1       | 0.99    | 90.24%             | 0.84           | 0.97    | 0       | 1       | 0.97    | 80.95%             |
|                 | Processed    | 0.95            | 1       | 0.99    | 1       | 1       | 97.56%             | 1              | 1       | 1       | 1       | 1       | 100%               |
| FTIR-cultivated | Raw          | 0.91            | 1       | 0.53    | 0.41    | 0.92    | 75.61%             | 0.90           | 1       | 1       | 0       | 0.97    | 80.95%             |
|                 | Processed    | 1               | 1       | 1       | 1       | 1       | 100%               | 1              | 1       | 1       | 1       | 1       | 100%               |

24

25 **Table S4.**

26 The class assignation of a sample in high-level data fusion using fuzzy set theory.

| Class 1, NO. 10 | Tree vote fractions of RF model |         |         |         |         | Individual decision | Ensemble decision |
|-----------------|---------------------------------|---------|---------|---------|---------|---------------------|-------------------|
|                 | Class 1                         | Class 2 | Class 3 | Class 4 | Class 5 |                     |                   |
| FTIR-Boruta     | 0.55                            | 0.17    | 0.04    | 0.06    | 0.17    | Class 1             |                   |
| LC-Boruta       | 0.23                            | 0.36    | 0.09    | 0.16    | 0.17    | Class 2             |                   |
| Minimum         | 0.23                            | 0.17    | 0.04    | 0.06    | 0.17    |                     | Class 1           |
| Maximum         | 0.55                            | 0.36    | 0.09    | 0.16    | 0.17    |                     | Class 1           |
| Product         | 0.13                            | 0.06    | 0.00    | 0.01    | 0.03    |                     | Class 1           |
| Average         | 0.39                            | 0.26    | 0.07    | 0.11    | 0.17    |                     | Class 1           |
| Majority vote   | √                               | √       | √       | √       |         |                     | Class 1           |

27

28

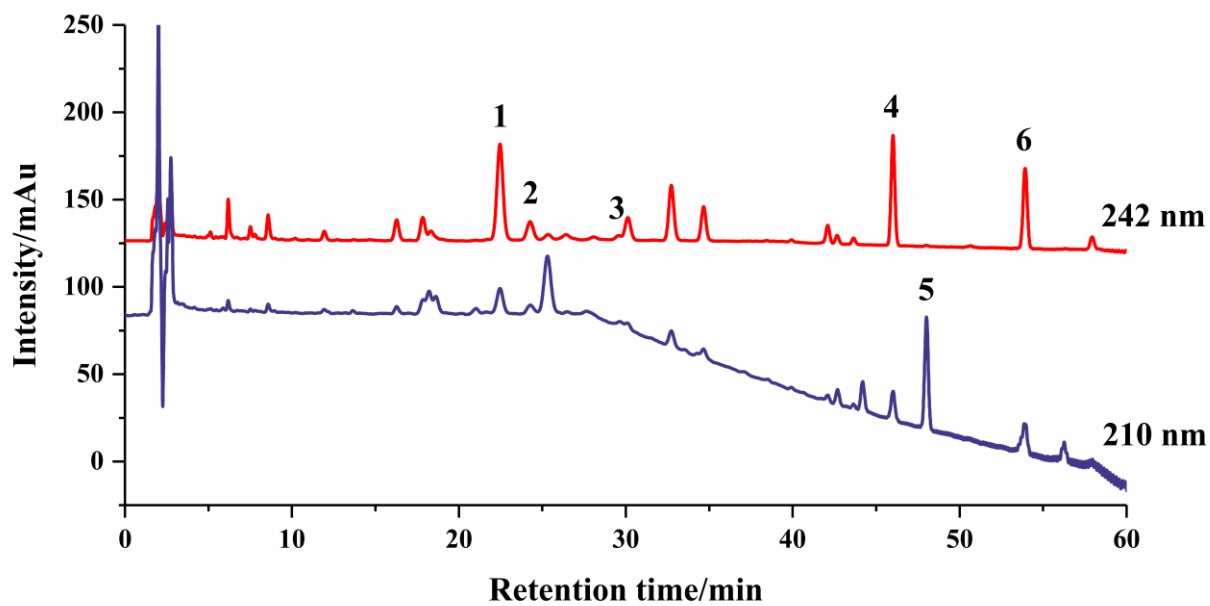

29

30 Figure S1. The chromatograms of *M. cocos* at 242 nm and 210 nm. Note: Peak 1-6 are dehydrotumulosic acid,  
31 poricoic acid A, 3-epidehydrotumulosic acid, dehydropachymic acid, pachymic acid and dehydrotrametenolic acid.

32

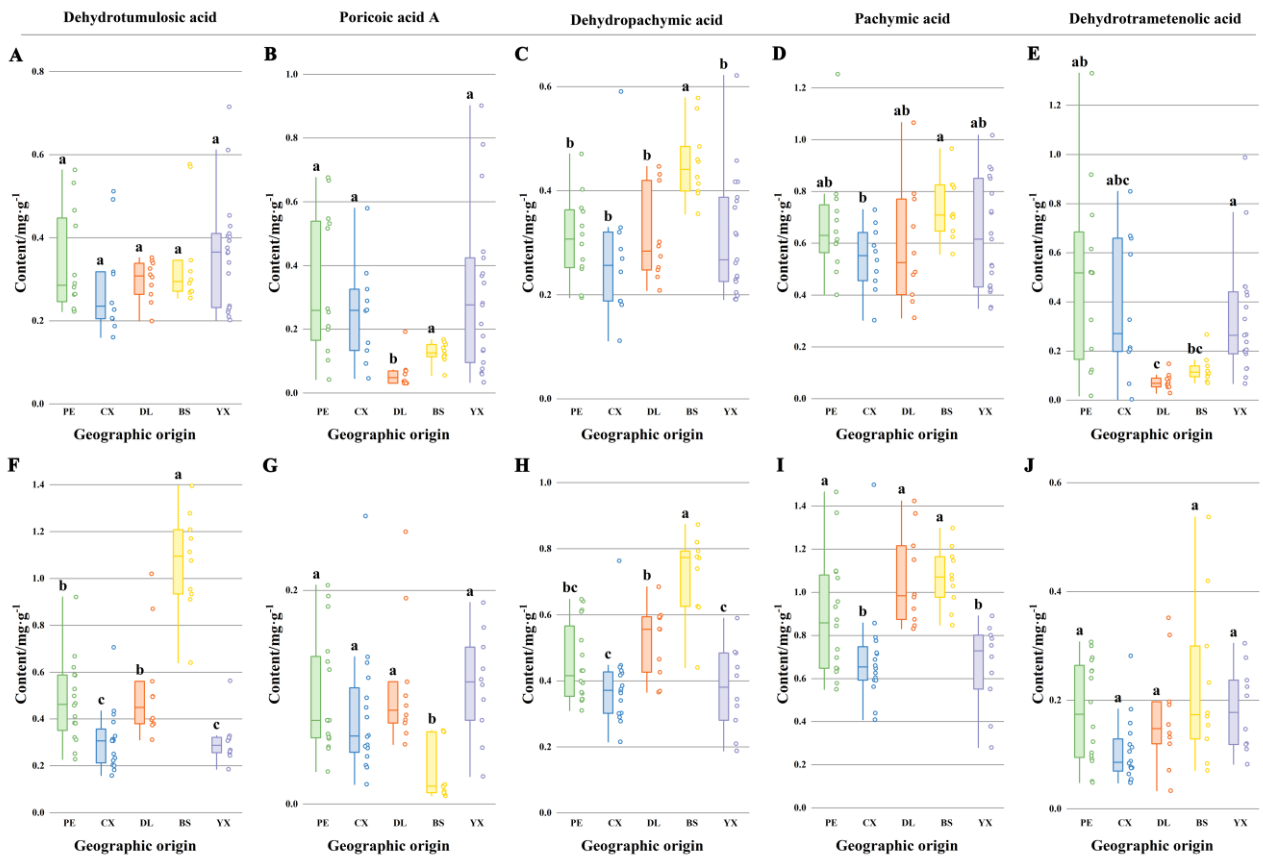

33  
 34 Figure S2. The box-plots of dehydrotumulosic acid, poricoic acid A, dehydropachymic acid, pachymic acid and  
 35 dehydrotrametenolic acid in wild (A-E) and cultivated (F-J) *M. cocos* samples from five regions. Note: The tick  
 36 values of vertical are the same; Different letters show significant difference ( $P < 0.05$ ).  
 37

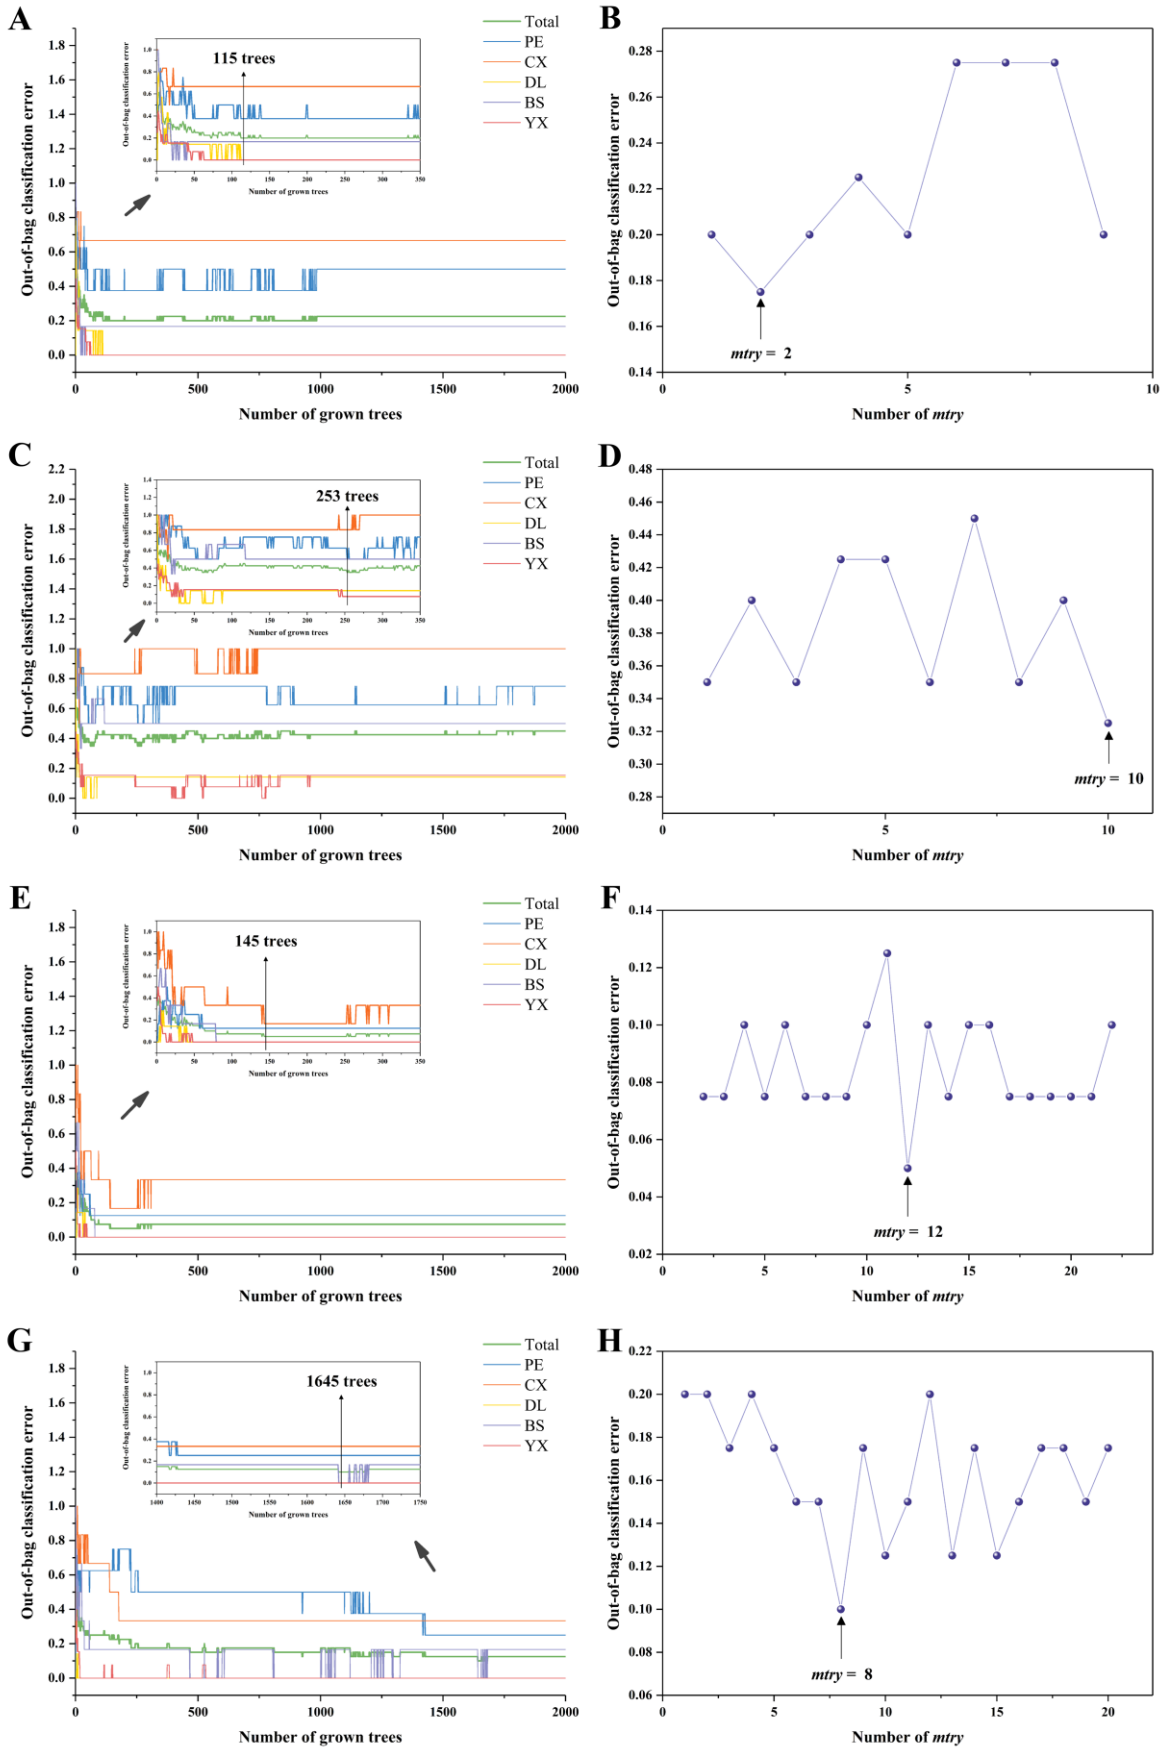

38

39 Figure S3. The  $n_{tree}$  and  $mtry$  screening of the random forest models of low-level (AB), Mid-level-PCA (CD) and  
 40 Mid-level-Boruta (EF).



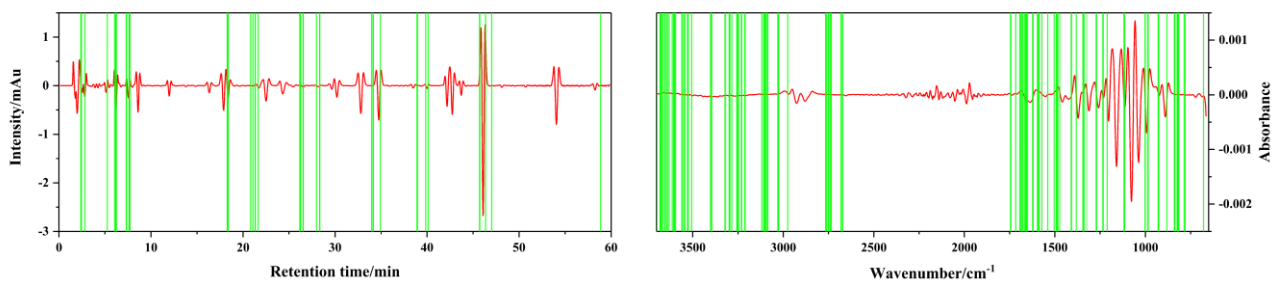

41

42 Figure S4. The variables (under the green lines) selected from LC (left) and FTIR (right) data in Mid-level-Boruta  
43 data fusion, appended with the derivative signals recorded on a sample (red lines).

44

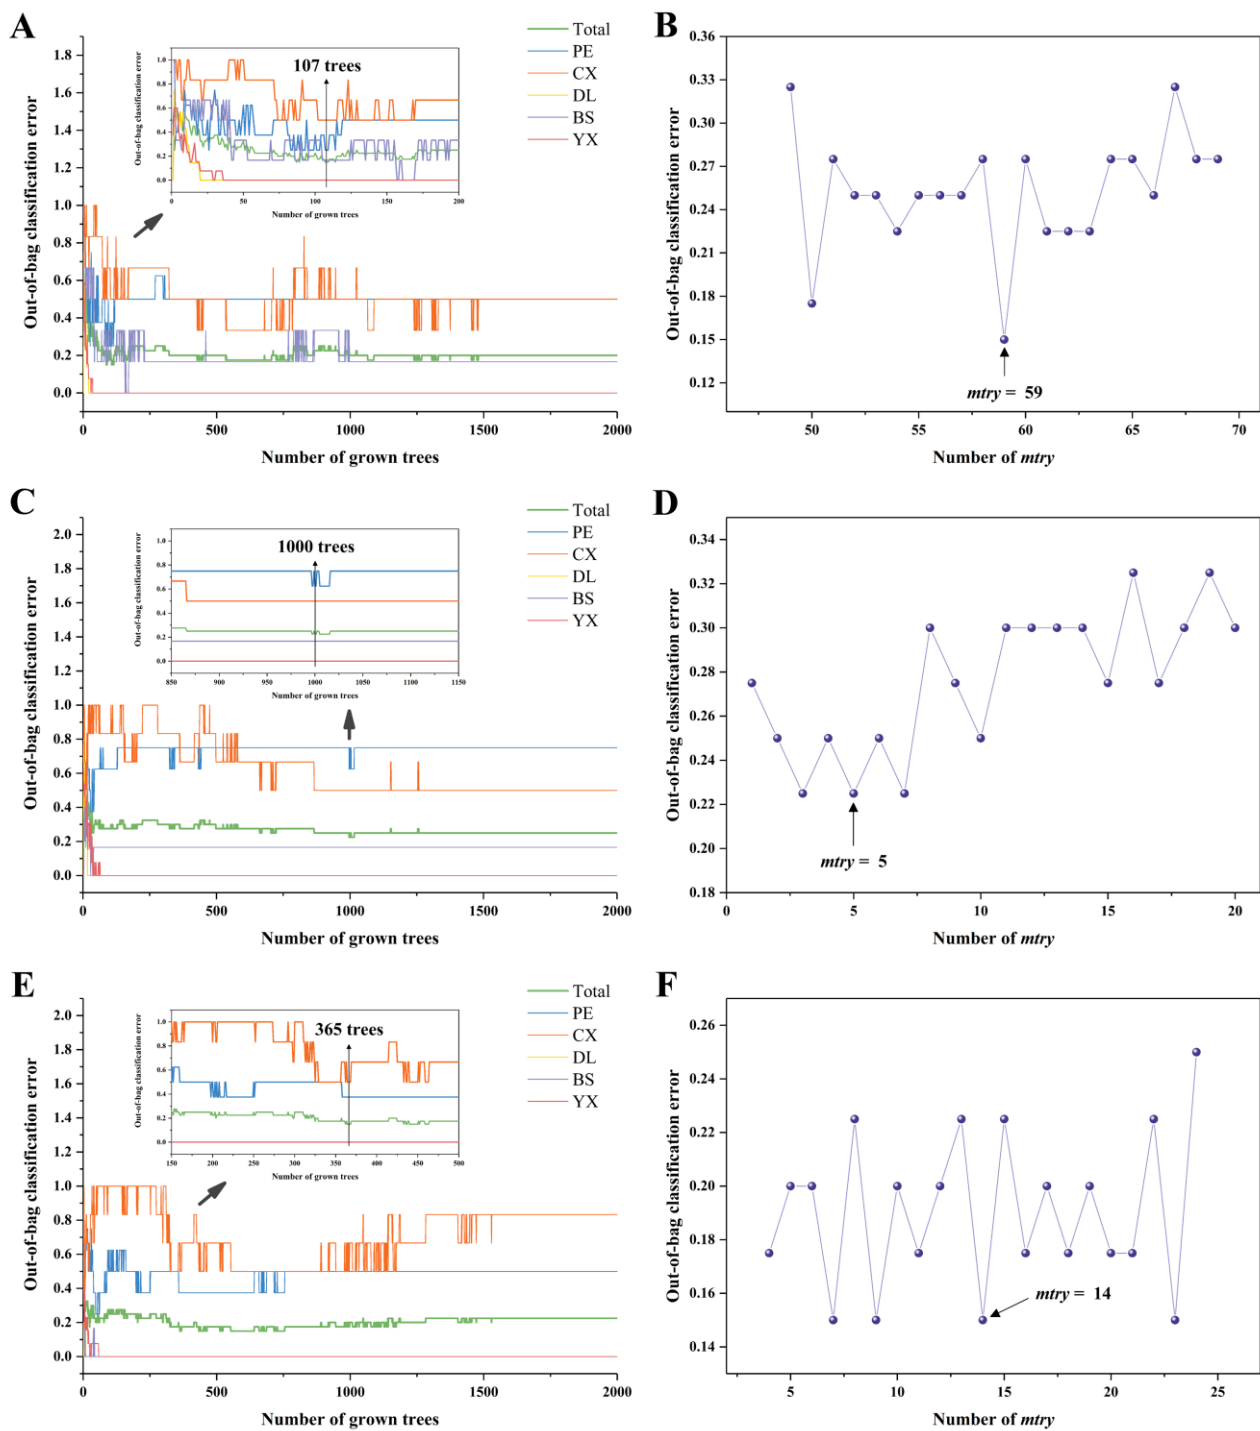

45  
46  
47  
48  
49

Figure S5. The  $n_{tree}$  and  $mtry$  screening of the random forest models regarding high-level data fusion. Note: A-B: FTIR of High-level-PCA; C-D: LC of High-level-PCA; E-F: FTIR of High-level-Boruta; G-H: LC of High-level-Boruta.

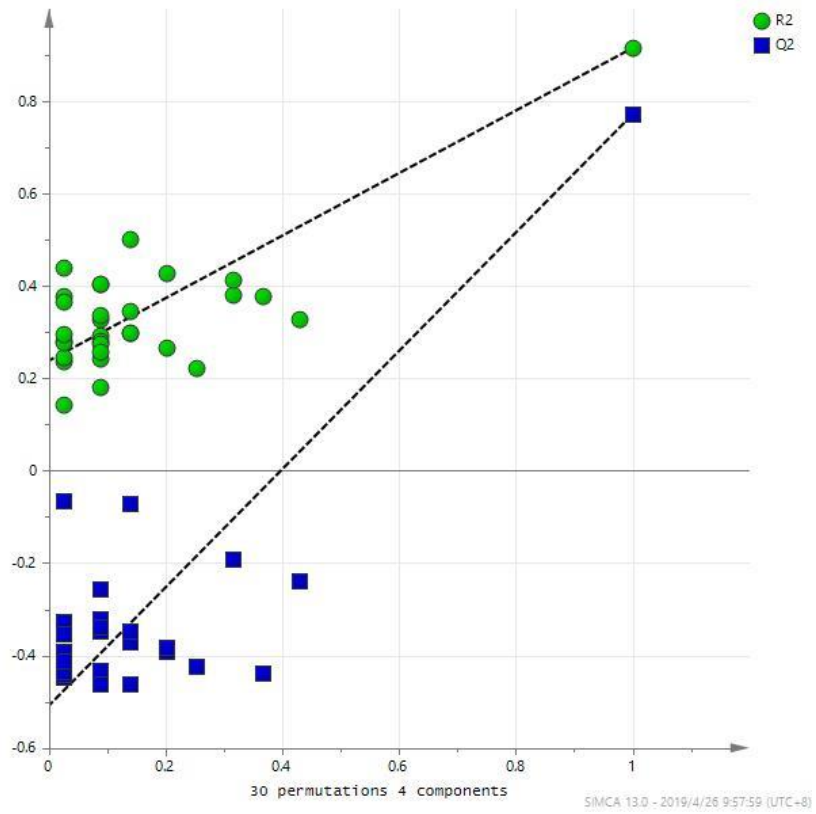

50

51 Figure S6. The permutations plot for Mid-level-PCA model.
